# Supplementary material
Source: ML conference proceedings conference paper supplement (https://proceedings.neurips.cc/paper_files/paper/2022/hash/dececdcbf0ea0162234a8fb4ab051415-Abstract.html)
Supplement: Supplementary file 1 [file dececdcbf0ea0162234a8fb4ab051415-Supplemental-Conference.pdf]

## A Basic Inequalities

Firstly, we present some preliminary inequalities that will be frequently used in the subsequent proofs.

**Fact 1** (Cauchy-Schwarz Inequality). *For any  $x, y \in \mathbb{R}^d$ ,*

$$|\langle x, y \rangle| \leq \|x\| \cdot \|y\|. \quad (15)$$

**Fact 2.** *For arbitrary set of  $N$  vectors  $\{x_i\}_{i=1}^N, x_i \in \mathbb{R}^d$ ,*

$$\left\| \sum_{i=1}^N x_i \right\|^2 \leq N \sum_{i=1}^N \|x_i\|^2. \quad (16)$$

**Fact 3.** *For any  $x, y \in \mathbb{R}^d$ ,*

$$\|x + y\|^2 \leq (1 + \alpha)\|x\|^2 + (1 + \alpha^{-1})\|y\|^2, \quad \forall \alpha > 0. \quad (17)$$

**Fact 4.** *Given a convex set  $\mathcal{K} \in \mathbb{R}^d$ , the projection operator satisfies the following properties*

$$(i) \quad \|P_{\mathcal{K}}(x) - P_{\mathcal{K}}(y)\| \leq \|x - y\|, \quad \forall x, y \in \mathbb{R}^d. \quad (18)$$

$$(ii) \quad \|P_{\mathcal{K}}(x) - x\| \leq \|x - y\|, \quad \forall x \in \mathbb{R}^d, y \in \mathcal{K}. \quad (19)$$

$$(iii) \quad \langle P_{\mathcal{K}}(x) - x, x - y \rangle \leq -\|P_{\mathcal{K}}(x) - x\|^2 \leq 0, \quad \forall x \in \mathbb{R}^d, y \in \mathcal{K}. \quad (20)$$

**Fact 5** (Jensen's Inequality). *Given a convex function  $f$  and a random variable  $x$ , then*

$$f(\mathbb{E}[x]) \leq \mathbb{E}[f(x)]. \quad (21)$$

## B Proofs of Section 2

Define

$$\tilde{x}_i^{t+1} := x_i^t + \gamma \sum_{j \in \mathcal{N}_i} a_{ij} (\hat{x}_j^{t+1} - \hat{x}_i^{t+1}) - \eta_t \nabla f_i^t(x_i^t), \quad (22)$$

$$r_i^{t+1} := P_{\mathcal{K}}(\tilde{x}_i^{t+1}) - \tilde{x}_i^{t+1}, \quad (23)$$

$$\bar{x}^t := \frac{1}{N} \sum_{i=1}^N x_i^t, \quad (24)$$

and then

$$x_i^{t+1} = P_{\mathcal{K}}(\tilde{x}_i^{t+1}) = \tilde{x}_i^{t+1} + r_i^{t+1}. \quad (25)$$

For notational simplicity, define matrices

$$X^t := \text{col}\{x_1^t, \dots, x_N^t\}, \quad \tilde{X}^t := \text{col}\{\tilde{x}_1^t, \dots, \tilde{x}_N^t\}, \quad \bar{X}^t := \text{col}\{\bar{x}^t, \dots, \bar{x}^t\},$$

$$R^t := \text{col}\{r_1^t, \dots, r_N^t\}, \quad \nabla F^t(X^t) := \text{col}\{\nabla f_1^t(x_1^t), \dots, \nabla f_N^t(x_N^t)\}.$$

Denote by  $\mathbf{1}_N$  the  $N$ -dimension column vector with all components being one, and  $M := \frac{1}{N} \mathbf{1}_N \mathbf{1}_N^\top$ ,  $\mathbf{M} := M \otimes I_d$ . Then  $\bar{X}^t = \mathbf{M} X^t$ . Define the Laplacian matrix  $L := I_N - A$  and  $\bar{L} := \bar{L} \otimes I_d$ ,  $\mathbf{I} := I_N \otimes I_d$ , where  $\otimes$  is the Kronecher product. Denote by  $L_i$  the  $i$ -th row of  $L$ . Then by Remark 1, Algorithm 1 can be written in the matrix form as

$$\hat{X}^{t+1} = \hat{X}^t + Q(X^t - \hat{X}^t), \quad (26)$$

$$X^{t+1} = P_{\mathcal{K}}\left(X^t - \gamma \mathbf{L} \hat{X}^{t+1} - \eta_t \nabla F^t(X^t)\right) \quad (27)$$

$$= \tilde{X}^{t+1} + R^{t+1}. \quad (28)$$

To begin with, we consider general regret bounds.

**Lemma 1.** Consider Algorithm 1 with non-increasing gradient descent stepsizes  $\{\eta_t\}_{t=1}^T$ .

(i) (Convex case) Suppose Assumptions 1, 3, 4 hold. Then for each  $j \in \mathcal{V}$ :

$$\begin{aligned} \mathsf{R}(j, T) &\leq \frac{ND^2}{2\eta_T} + NG^2 \sum_{t=1}^T \eta_t + (2\sqrt{N} + N)G \sum_{t=1}^T \|X^t - \bar{X}^t\| \\ &\quad + \sum_{t=1}^T \frac{1}{2\eta_t} \left( \|\bar{X}^t - \bar{X}^{t+1}\|^2 + 3\|R^{t+1}\|^2 \right). \end{aligned} \quad (29)$$

(ii) (Strongly convex case) Suppose Assumptions 1, 3, 4, 5 hold and  $\eta_t = \frac{1}{\mu(t+c)}$  for a constant  $c \geq 0$ . Then for each  $j \in \mathcal{V}$ :

$$\begin{aligned} \mathsf{R}(j, T) &\leq \mu c D^2 + NG^2 \sum_{t=1}^T \eta_t + (2\sqrt{N} + N)G \sum_{t=1}^T \|X^t - \bar{X}^t\| \\ &\quad + \sum_{t=1}^T \frac{1}{2\eta_t} \left( \|\bar{X}^t - \bar{X}^{t+1}\|^2 + 3\|R^{t+1}\|^2 \right). \end{aligned} \quad (30)$$

*Proof.* Because  $\sum_{i=1}^N \sum_{j \in \mathcal{N}_i} a_{ij}(\hat{x}_j^{t+1} - \hat{x}_i^{t+1}) = 0$  under Assumption 1, with the introduction of the projection error  $r_i^{t+1}$ , we can write

$$\bar{x}^{t+1} = \frac{1}{N} \sum_{i=1}^N (\tilde{x}_i^{t+1} + r_i^{t+1}) = \bar{x}^t - \frac{\eta_t}{N} \sum_{i=1}^N \nabla f_i^t(x_i^t) + \frac{1}{N} \sum_{i=1}^N r_i^{t+1}.$$

Denote by  $x^*$  the best decision in the hindsight, i.e.,  $x^* = \arg \min_{x \in \mathcal{K}} \sum_{t=1}^T \sum_{i=1}^N f_i^t(x)$ . Then,

$$\begin{aligned} \|\bar{x}^{t+1} - x^*\|^2 &= \|\bar{x}^t - x^*\|^2 + \frac{1}{N^2} \left\| \sum_{i=1}^N r_i^{t+1} - \eta_t \sum_{i=1}^N \nabla f_i^t(x_i^t) \right\|^2 \\ &\quad + \frac{2}{N} \sum_{i=1}^N \langle r_i^{t+1}, \bar{x}^t - x^* \rangle - \frac{2\eta_t}{N} \sum_{i=1}^N \langle \nabla f_i^t(x_i^t), \bar{x}^t - x^* \rangle. \end{aligned} \quad (31)$$

Under Assumption 4, we estimate the second term

$$\begin{aligned} \frac{1}{N^2} \left\| \sum_{i=1}^N r_i^{t+1} - \eta_t \sum_{i=1}^N \nabla f_i^t(x_i^t) \right\|^2 &= \frac{1}{N^2} \left( 2 \left\| \sum_{i=1}^N r_i^{t+1} \right\|^2 + 2\eta_t^2 \left\| \sum_{i=1}^N \nabla f_i^t(x_i^t) \right\|^2 \right) \\ &\stackrel{(16)}{\leq} \frac{1}{N^2} \left( 2N \sum_{i=1}^N \|r_i^{t+1}\|^2 + 2\eta_t^2 N^2 G^2 \right) = \frac{2}{N} \|R^{t+1}\|^2 + 2\eta_t^2 G^2. \end{aligned} \quad (32)$$

Then we come to the third term. Noting that  $x^* \in \mathcal{K}$ , by using the definition of  $r_i^{t+1}$  and the projection property (iii), we have

$$\begin{aligned} \sum_{i=1}^N \langle r_i^{t+1}, \bar{x}^t - x^* \rangle &= \sum_{i=1}^N (\langle r_i^{t+1}, \bar{x}^t - \tilde{x}_i^{t+1} \rangle + \langle P_{\mathcal{K}}(\tilde{x}_i^{t+1}) - \tilde{x}_i^{t+1}, \tilde{x}_i^{t+1} - x^* \rangle) \\ &\stackrel{(20)}{\leq} \sum_{i=1}^N \langle r_i^{t+1}, \bar{x}^t - \tilde{x}_i^{t+1} \rangle \leq \sum_{i=1}^N \frac{1}{2} (\|r_i^{t+1}\|^2 + \|\bar{x}^t - \tilde{x}_i^{t+1}\|^2) = \frac{1}{2} (\|R^{t+1}\|^2 + \|\bar{X}^t - \bar{X}^{t+1}\|^2). \end{aligned} \quad (33)$$

Next we turn to the fourth term. Under Assumption 4,

$$f_i^t(x_i^t) \geq f_i^t(x_j^t) + \langle \nabla f_i^t(x_j^t), x_i^t - x_j^t \rangle \geq f_i^t(x_j^t) - G\|x_i^t - x_j^t\|,$$

and hence,

$$\begin{aligned} -\langle \nabla f_i^t(x_i^t), \bar{x}^t - x^* \rangle &= \langle \nabla f_i^t(x_i^t), x^* - x_i^t \rangle + \langle \nabla f_i^t(x_i^t), x_i^t - \bar{x}^t \rangle \\ &\leq f_i^t(x^*) - f_i^t(x_i^t) - \frac{\mu}{2} \|x^* - x_i^t\|^2 + G\|x_i^t - \bar{x}^t\| \\ &\leq f_i^t(x^*) - f_i^t(x_j^t) + G\|x_i^t - x_j^t\| - \frac{\mu}{2} \|x^* - x_i^t\|^2 + G\|x_i^t - \bar{x}^t\|, \end{aligned} \quad (34)$$

where  $\mu > 0$  for the strongly convex case and  $\mu \equiv 0$  for the convex case. Summing up (34) over  $i = 1, \dots, N$  with the fact that

$$\begin{aligned} \sum_{i=1}^N \|x_i^t - x_j^t\| &\leq \sum_{i=1}^N \|x_i^t - \bar{x}^t\| + N\|\bar{x}^t - x_j^t\| \leq \sqrt{N}\|X^t - \bar{X}^t\| + N\|X^t - \bar{X}^t\|, \\ \sum_{i=1}^N \|x^* - x_i^t\|^2 &\geq \frac{1}{N} \left\| \sum_{i=1}^N (x^* - x_i^t) \right\|^2 \geq \frac{1}{N} \|Nx^* - N\bar{x}^t\|^2 = N\|x^* - \bar{x}^t\|^2, \end{aligned}$$

we have

$$-\sum_{i=1}^N \langle \nabla f_i^t(x_i^t), \bar{x}^t - x^* \rangle \leq \sum_{i=1}^N (f_i^t(x^*) - f_i^t(x_j^t)) + (2\sqrt{N} + N)G\|X^t - \bar{X}^t\| - \frac{N\mu}{2} \|x^* - \bar{x}^t\|^2. \quad (35)$$

By substituting (32), (33), and (35) into (31), we derive

$$\begin{aligned} \|\bar{x}^{t+1} - x^*\|^2 &\leq \|\bar{x}^t - x^*\|^2 + \frac{2}{N} \|R^{t+1}\|^2 + 2\eta_t^2 G^2 + \frac{1}{N} \left( \|R^{t+1}\|^2 + \|\bar{X}^t - \tilde{X}^{t+1}\|^2 \right) \\ &\quad + \frac{2\eta_t}{N} \left( \sum_{i=1}^N (f_i^t(x^*) - f_i^t(x_j^t)) + (2\sqrt{N} + N)G\|X^t - \bar{X}^t\| - \frac{N\mu}{2} \|x^* - \bar{x}^t\|^2 \right). \end{aligned}$$

By rearranging the terms,

$$\begin{aligned} \sum_{i=1}^N (f_i^t(x_j^t) - f_i^t(x^*)) &\leq \frac{N}{2} \left( \left( \frac{1}{\eta_t} - \mu \right) \|\bar{x}^t - x^*\|^2 - \frac{1}{\eta_t} \|\bar{x}^{t+1} - x^*\|^2 \right) \\ &\quad + NG^2\eta_t + (2\sqrt{N} + N)G\|X^t - \bar{X}^t\| + \frac{1}{2\eta_t} \left( \|\bar{X}^t - \tilde{X}^{t+1}\|^2 + 3\|R^{t+1}\|^2 \right). \end{aligned}$$

Summing up the above inequality over  $t = 1, \dots, T$  gives

$$\begin{aligned} \sum_{t=1}^T \sum_{i=1}^N (f_i^t(x_j^t) - f_i^t(x^*)) &\leq \frac{N}{2} \sum_{t=1}^T \left( \frac{1}{\eta_t} - \frac{1}{\eta_{t-1}} - \mu \right) \|\bar{x}^t - x^*\|^2 + NG^2 \sum_{t=1}^T \eta_t \\ &\quad + (2\sqrt{N} + N)G \sum_{t=1}^T \|X^t - \bar{X}^t\| + \sum_{t=1}^T \frac{1}{2\eta_t} \left( \|\bar{X}^t - \tilde{X}^{t+1}\|^2 + 3\|R^{t+1}\|^2 \right), \frac{1}{\eta_0} \triangleq 0 \end{aligned} \quad (36)$$

(i) In the convex case,  $\mu \equiv 0$ . Using Assumption 3 with the non-increasing of  $\{\eta_t\}_{t=1}^T$ , we have

$$\sum_{t=1}^T \left( \frac{1}{\eta_t} - \frac{1}{\eta_{t-1}} \right) \|\bar{x}^t - x^*\|^2 \leq \sum_{t=1}^T \left( \frac{1}{\eta_t} - \frac{1}{\eta_{t-1}} \right) D^2 \leq \frac{D^2}{\eta_T}. \quad (37)$$

By substituting (37) into (36), we derive (29).

(ii) Under Assumption 5,  $\mu > 0$ , and thus,  $\eta_t = \frac{1}{\mu(t+c)}$  implies  $\frac{1}{\eta_t} - \frac{1}{\eta_{t-1}} - \mu = 0, \forall t \geq 2$ . Then

$$\sum_{t=1}^T \left( \frac{1}{\eta_t} - \frac{1}{\eta_{t-1}} - \mu \right) \|\bar{x}^t - x^*\|^2 = \left( \frac{1}{\eta_1} - \mu \right) \|\bar{x}^1 - x^*\|^2 \leq \mu c D^2. \quad (38)$$

By substituting (38) into (36), we derive (30). □

The following key lemma analyzes the relationship between the projection error, the consensus error, and the compressor error, and makes it possible to control these errors by the consensus stepsize  $\gamma$  and the gradient descent stepsize  $\eta_t$ .

**Lemma 2.** *Suppose Assumptions 1, 2 and 4 hold. Consider Algorithm 1 with the consensus stepsize  $\gamma \in (0, 1]$  and arbitrary gradient descent stepsizes  $\{\eta_t\}_{t=1}^T$ .*

$$(i) \mathbb{E}_Q \|R^{t+1}\|^2 \leq 2(1-\omega)\beta^2\gamma^2 \|X^t - \hat{X}^t\|^2 + 2NG^2\eta_t^2. \quad (39)$$

$$(ii) \mathbb{E}_Q \|X^{t+1} - \bar{X}^{t+1}\|^2 \leq (1-\gamma\delta)\mathbb{E}_Q \|X^t - \bar{X}^t\|^2 + 9\left(1 + \frac{2}{\gamma\delta}\right)NG^2\eta_t^2 \\ + 9\left(1 + \frac{2}{\delta}\right)(1-\omega)\beta^2\gamma \|X^t - \hat{X}^t\|^2. \quad (40)$$

$$(iii) \mathbb{E}_Q \|X^{t+1} - \hat{X}^{t+1}\|^2 \leq 3\left(1 + \frac{2}{\omega}\right)\gamma\beta^2\mathbb{E}_Q \|X^t - \bar{X}^t\|^2 + 9\left(1 + \frac{2}{\omega}\right)NG^2\eta_t^2 \\ + \left(\left(1 + \frac{\omega}{2}\right)(1-\omega)(1 + (\beta^2 + 2\beta)\gamma) + 6\left(1 + \frac{2}{\omega}\right)(1-\omega)\beta^2\gamma\right) \|X^t - \hat{X}^t\|^2. \quad (41)$$

*Proof.* First of all, by Assumption 2 and the update rule of  $\hat{X}^{t+1}$ ,

$$\mathbb{E}_Q \|X^t - \hat{X}^{t+1}\|^2 \stackrel{(26)}{=} \mathbb{E}_Q \|X^t - \hat{X}^t - Q(X^t - \hat{X}^t)\|^2 \leq (1-\omega) \|X^t - \hat{X}^t\|^2. \quad (42)$$

(i) By Assumption 1,  $\sum_{j \in \mathcal{N}_i} a_{ij} = 1$ . Since  $\mathcal{K}$  is a convex set and  $x_j^t \in \mathcal{K}$ , we have  $\sum_{j \in \mathcal{N}_i} a_{ij}x_j^t \in \mathcal{K}$  and  $(1-\gamma)x_i^t + \gamma \sum_{j \in \mathcal{N}_i} a_{ij}x_j^t \in \mathcal{K}$  for  $\gamma \in (0, 1]$ . By the projection property (ii),

$$\|r_i^{t+1}\| = \|P_{\mathcal{K}}(\tilde{x}_i^{t+1}) - \tilde{x}_i^{t+1}\| \\ \stackrel{(19)}{\leq} \left\| (1-\gamma)x_i^t + \gamma \sum_{j \in \mathcal{N}_i} a_{ij}x_j^t - \tilde{x}_i^{t+1} \right\| \\ = \left\| x_i^t + \gamma \sum_{j \in \mathcal{N}_i} a_{ij}(x_j^t - x_i^t) - \left( x_i^t + \gamma \sum_{j \in \mathcal{N}_i} a_{ij}(\hat{x}_j^{t+1} - \hat{x}_i^{t+1}) - \eta_t \nabla f_i^t(x_i^t) \right) \right\| \\ = \left\| -\gamma \mathbf{L}_i(X^t - \hat{X}^t) + \eta_t \nabla f_i^t(x_i^t) \right\|.$$

Then, we can estimate the total projection error as

$$\|R^{t+1}\|^2 = \sum_{i=1}^N \|r_i^{t+1}\|^2 \leq \sum_{i=1}^N \left( 2 \left\| \gamma \mathbf{L}_i(X^t - \hat{X}^{t+1}) \right\|^2 + 2 \left\| \eta_t \nabla f_i^t(x_i^t) \right\|^2 \right) \\ \leq 2 \left\| \gamma \mathbf{L}(X^t - \hat{X}^{t+1}) \right\|^2 + 2NG^2\eta_t^2 = 2\gamma^2\beta^2 \|X^t - \hat{X}^{t+1}\|^2 + 2NG^2\eta_t^2, \quad (43)$$

which is controlled by  $\gamma$  and  $\eta_t$ . By taking expectation over the internal randomness of the compressor  $Q$  with respect to the above inequality and using (42), we derive (39).

(ii) Under Assumption 1,  $\mathbf{M}\mathbf{L} = \mathbf{L}\mathbf{M} = 0$  and  $\mathbf{L}\bar{X}^t = \mathbf{L}\mathbf{M}X^t = 0$ . By the update rule of  $X^{t+1}$ ,

$$\|X^{t+1} - \bar{X}^{t+1}\|^2 \\ \stackrel{(28)}{=} \left\| X^t - \gamma \mathbf{L}\hat{X}^{t+1} - \eta_t \nabla F^t(X^t) + R^{t+1} - \mathbf{M} \left( X^t - \gamma \mathbf{L}\hat{X}^{t+1} - \eta_t \nabla F^t(X^t) + R^{t+1} \right) \right\|^2 \\ = \left\| X^t - \bar{X}^t - \gamma \mathbf{L}\hat{X}^{t+1} - \eta_t (\mathbf{I} - \mathbf{M}) \nabla F^t(X^t) + (\mathbf{I} - \mathbf{M}) R^{t+1} \right\|^2 \\ = \left\| (\mathbf{I} - \gamma \mathbf{L})(X^t - \bar{X}^t) - \gamma \mathbf{L}(\hat{X}^{t+1} - X^t) - \eta_t (\mathbf{I} - \mathbf{M}) \nabla F^t(X^t) + (\mathbf{I} - \mathbf{M}) R^{t+1} \right\|^2 \\ \stackrel{(17)}{\leq} \left( 1 + \frac{\gamma\delta}{2} \right) \left\| (\mathbf{I} - \gamma \mathbf{L})(X^t - \bar{X}^t) \right\|^2 \\ + \left( 1 + \frac{2}{\gamma\delta} \right) \left\| -\gamma \mathbf{L}(\hat{X}^{t+1} - X^t) - \eta_t (\mathbf{I} - \mathbf{M}) \nabla F^t(X^t) + (\mathbf{I} - \mathbf{M}) R^{t+1} \right\|^2. \quad (44)$$

The first term can be estimated by

$$\begin{aligned}
\|(\mathbf{I} - \gamma\mathbf{L})(X^t - \bar{X}^t)\| &= \|((1 - \gamma)\mathbf{I} + \gamma\mathbf{A})(X^t - \bar{X}^t)\| \\
&= (1 - \gamma)\|X^t - \bar{X}^t\| + \gamma\|(\mathbf{A} - \mathbf{M})(X^t - \bar{X}^t)\| \\
&\leq (1 - \gamma)\|X^t - \bar{X}^t\| + \gamma(1 - \delta)\|X^t - \bar{X}^t\| \\
&= (1 - \gamma\delta)\|X^t - \bar{X}^t\|, \tag{45}
\end{aligned}$$

because  $\mathbf{M}(X^t - \bar{X}^t) = \bar{X}^t - \bar{X}^t = 0$  and  $\|\mathbf{A} - \mathbf{M}\|_2 = 1 - \delta$ . The expectation of the second term can be estimated by

$$\begin{aligned}
&\mathbb{E}_Q \left\| -\gamma\mathbf{L}(\hat{X}^{t+1} - X^t) - \eta_t(\mathbf{I} - \mathbf{M})\nabla F^t(X^t) + (\mathbf{I} - \mathbf{M})R^{t+1} \right\|^2 \\
&\leq \mathbb{E}_Q \left( 3\|\gamma\mathbf{L}(\hat{X}^{t+1} - X^t)\|^2 + 3\|\eta_t(\mathbf{I} - \mathbf{M})\nabla F^t(X^t)\|^2 + 3\|(\mathbf{I} - \mathbf{M})R^{t+1}\|^2 \right) \\
&\stackrel{(39)}{\leq} 3\left( \gamma^2\beta^2(1 - \omega)\|\hat{X}^t - X^t\|^2 + NG^2\eta_t^2 + 2(1 - \omega)\beta^2\gamma^2\|X^t - \hat{X}^t\|^2 + 2NG^2\eta_t^2 \right) \\
&= 9\left( (1 - \omega)\beta^2\gamma^2\|X^t - \hat{X}^t\|^2 + NG^2\eta_t^2 \right). \tag{46}
\end{aligned}$$

By taking expectation over  $Q$  w.r.t the inequality (44), together with (45) and (46), we obtain

$$\begin{aligned}
\mathbb{E}_Q \|X^{t+1} - \bar{X}^{t+1}\|^2 &\leq \left(1 + \frac{\gamma\delta}{2}\right) (1 - \gamma\delta)^2 \mathbb{E}_Q \|X^t - \bar{X}^t\|^2 + 9\left(1 + \frac{2}{\gamma\delta}\right) NG^2\eta_t^2 \\
&\quad + 9\left(1 + \frac{2}{\gamma\delta}\right) (1 - \omega)\beta^2\gamma^2\|X^t - \hat{X}^t\|^2 \tag{47}
\end{aligned}$$

$$\begin{aligned}
&\leq (1 - \gamma\delta)\mathbb{E}_Q \|X^t - \bar{X}^t\|^2 + 9\left(1 + \frac{2}{\gamma\delta}\right) NG^2\eta_t^2 \\
&\quad + 9\left(1 + \frac{2}{\delta}\right) (1 - \omega)\beta^2\gamma\|X^t - \hat{X}^t\|^2, \tag{48}
\end{aligned}$$

since  $\left(1 + \frac{\gamma\delta}{2}\right) (1 - \gamma\delta)^2 \leq \left(1 - \frac{\gamma\delta}{2}\right) (1 - \gamma\delta) \leq 1 - \gamma\delta$  and  $\gamma \leq 1$ .

(iii) Similarly to the procedure of (ii), we have

$$\begin{aligned}
\|X^{t+1} - \hat{X}^{t+1}\|^2 &\stackrel{(28)}{\leq} \|X^t - \gamma\mathbf{L}\hat{X}^{t+1} - \eta_t\nabla F^t(X^t) + R^{t+1} - \hat{X}^{t+1}\|^2 \\
&= \|(\mathbf{I} + \gamma\mathbf{L})(X^t - \hat{X}^{t+1}) - \gamma\mathbf{L}(X^t - \bar{X}^t) - \eta_t\nabla F^t(X^t) + R^{t+1}\|^2 \\
&\stackrel{(17)}{\leq} \left(1 + \frac{\omega}{2}\right) \|(\mathbf{I} + \gamma\mathbf{L})(X^t - \hat{X}^{t+1})\|^2 \\
&\quad + \left(1 + \frac{2}{\omega}\right) \|-\gamma\mathbf{L}(X^t - \bar{X}^t) - \eta_t\nabla F^t(X^t) + R^{t+1}\|^2. \tag{49}
\end{aligned}$$

The expectation of the first term can be estimated by

$$\begin{aligned}
\mathbb{E}_Q \|(\mathbf{I} + \gamma\mathbf{L})(X^t - \hat{X}^{t+1})\|^2 &\leq (1 + \gamma\beta)^2 \mathbb{E}_Q \|X^t - \hat{X}^{t+1}\|^2 \\
&\stackrel{(42)}{\leq} (1 + \gamma\beta)^2 (1 - \omega) \|X^t - \hat{X}^t\|^2, \tag{50}
\end{aligned}$$

due to  $\|\mathbf{I} + \gamma\mathbf{L}\|_2 = 1 + \gamma\|L\|_2 = 1 + \gamma\beta$ , since the eigenvalues of  $\gamma L$  are positive. The expectation of the second term can be estimated by

$$\begin{aligned}
&\mathbb{E}_Q \left\| -\gamma\mathbf{L}(X^t - \bar{X}^t) - \eta_t\nabla F^t(X^t) + R^{t+1} \right\|^2 \\
&\leq \mathbb{E}_Q \left( 3\|\gamma\mathbf{L}(X^t - \bar{X}^t)\|^2 + 3\|\eta_t\nabla F^t(X^t)\|^2 + 3\|R^{t+1}\|^2 \right) \\
&\stackrel{(39)}{\leq} 3\gamma^2\beta^2\mathbb{E}_Q \|X^t - \bar{X}^t\|^2 + 3NG^2\eta_t^2 + 6(1 - \omega)\beta^2\gamma^2\|X^t - \hat{X}^t\|^2 + 6NG^2\eta_t^2. \tag{51}
\end{aligned}$$

By taking expectation over  $Q$  w.r.t the inequality (49), together with (50) and (51), we obtain

$$\begin{aligned}
\mathbb{E}_Q \left\| X^{t+1} - \hat{X}^{t+1} \right\|^2 &\leq 3 \left( 1 + \frac{2}{\omega} \right) \gamma^2 \beta^2 \mathbb{E}_Q \left\| X^t - \bar{X}^t \right\|^2 + 9 \left( 1 + \frac{2}{\omega} \right) N G^2 \eta_t^2 \\
&\quad + \left( \left( 1 + \frac{\omega}{2} \right) (1 - \omega) (1 + \gamma \beta)^2 + 6 \left( 1 + \frac{2}{\omega} \right) (1 - \omega) \beta^2 \gamma^2 \right) \left\| X^t - \hat{X}^t \right\|^2 \\
&\leq 3 \left( 1 + \frac{2}{\omega} \right) \gamma \beta^2 \mathbb{E}_Q \left\| X^t - \bar{X}^t \right\|^2 + 9 \left( 1 + \frac{2}{\omega} \right) N G^2 \eta_t^2 \\
&\quad + \left( \left( 1 + \frac{\omega}{2} \right) (1 - \omega) (1 + (\beta^2 + 2\beta)\gamma) + 6 \left( 1 + \frac{2}{\omega} \right) (1 - \omega) \beta^2 \gamma \right) \left\| X^t - \hat{X}^t \right\|^2, \quad (52)
\end{aligned}$$

since  $\gamma^2 \leq \gamma$  for  $\gamma \in (0, 1]$ .  $\square$

**Lemma 3.** *Suppose Assumptions 1, 2, and 4 hold. Consider Algorithm 1 with the consensus stepsize  $\gamma$  chosen as (5) and arbitrary gradient descent stepsizes  $\{\eta_t\}_{t=1}^T$ . Define*

$$e_t := \left\| \begin{bmatrix} \mathbb{E}_Q \left\| X^{t+1} - \bar{X}^{t+1} \right\| \\ \mathbb{E}_Q \left\| X^{t+1} - \hat{X}^{t+1} \right\| \end{bmatrix} \right\|.$$

Then for  $t = 1, \dots, T$ ,

$$e_{t+1} \leq \left( 1 - \frac{3}{4} \delta \gamma \right) e_t + 18 \left( 1 + \frac{1}{\gamma \delta} + \frac{1}{\omega} \right) N G^2 \eta_t^2. \quad (53)$$

*Proof.* By Lemma 2, we have

$$\begin{bmatrix} \mathbb{E}_Q \left\| X^{t+1} - \bar{X}^{t+1} \right\| \\ \mathbb{E}_Q \left\| X^{t+1} - \hat{X}^{t+1} \right\| \end{bmatrix} \leq U(\gamma) \begin{bmatrix} \mathbb{E}_Q \left\| X^t - \bar{X}^t \right\| \\ \mathbb{E}_Q \left\| X^t - \hat{X}^t \right\| \end{bmatrix} + 9 N G^2 \eta_t^2 \begin{bmatrix} 1 + \frac{2}{\gamma \delta} \\ 1 + \frac{2}{\omega} \end{bmatrix}, \quad (54)$$

where

$$U(\gamma) := \begin{bmatrix} 1 - \delta \gamma & 9 \left( 1 + \frac{2}{\omega} \right) (1 - \omega) \beta^2 \gamma \\ 3 \left( 1 + \frac{2}{\omega} \right) \beta^2 \gamma & \left( 1 + \frac{\omega}{2} \right) (1 - \omega) (1 + (\beta^2 + 2\beta)\gamma) + 6 \left( 1 + \frac{2}{\omega} \right) (1 - \omega) \beta^2 \gamma \end{bmatrix}.$$

For notation simplicity, we denote  $u_1 = 9 \left( 1 + \frac{2}{\omega} \right) (1 - \omega) \beta^2$ ,  $u_2 = 3 \left( 1 + \frac{2}{\omega} \right) \beta^2$ ,  $u_3 = \left( 1 + \frac{\omega}{2} \right) (1 - \omega) (\beta^2 + 2\beta) + 6 \left( 1 + \frac{2}{\omega} \right) (1 - \omega) \beta^2$ , and write

$$U(\gamma) = \begin{bmatrix} 1 - \delta \gamma & u_1 \gamma \\ u_2 \gamma & 1 - \frac{\omega}{2} - \frac{\omega^2}{2} + u_3 \gamma \end{bmatrix}.$$

By the definition of  $e_t$ , we obtain

$$\begin{aligned}
e_{t+1} &\leq \|U(\gamma)\|_2 e_t + 9 N G^2 \eta_t^2 \left\| \begin{bmatrix} 1 + \frac{2}{\gamma \delta} \\ 1 + \frac{2}{\omega} \end{bmatrix} \right\| \\
&\leq \rho(U(\gamma)) e_t + 9 N G^2 \eta_t^2 \left( 1 + \frac{2}{\gamma \delta} + 1 + \frac{2}{\omega} \right). \quad (55)
\end{aligned}$$

Next, we focus on the spectrum radius of the matrix  $U(\gamma)$ . The characteristic polynomial of  $U(\gamma)$  is

$$\begin{aligned}
h(\tau) &= \det(\tau I - U(\gamma)) \\
&= \tau^2 - \left( 1 - \delta \gamma + 1 - \frac{\omega}{2} - \frac{\omega^2}{2} + u_3 \gamma \right) \tau + (1 - \delta \gamma) \cdot \left( 1 - \frac{\omega}{2} - \frac{\omega^2}{2} + u_3 \gamma \right) - u_1 u_2 \gamma^2.
\end{aligned}$$

Since

$$\begin{aligned}
\Delta &= \left( 1 - \delta \gamma + 1 - \frac{\omega}{2} - \frac{\omega^2}{2} + u_3 \gamma \right)^2 - 4 \left( (1 - \delta \gamma) \cdot \left( 1 - \frac{\omega}{2} - \frac{\omega^2}{2} + u_3 \gamma \right) - u_1 u_2 \gamma^2 \right) \\
&= \left( 1 - \delta \gamma - \left( 1 - \frac{\omega}{2} - \frac{\omega^2}{2} + u_3 \gamma \right) \right)^2 + 4 u_1 u_2 \gamma^2 \geq 0, \quad (56)
\end{aligned}$$

the equation  $h(\tau) = 0$  has two roots  $\tau_1$  and  $\tau_2$ . Since  $1 - \delta\gamma + 1 - \frac{\omega}{2} - \frac{\omega^2}{2} + u_3\gamma \geq 0$ ,

$$\rho(U(\gamma)) = \max\{\tau_1, \tau_2\} = \frac{1}{2} \left( 1 - \delta\gamma + 1 - \frac{\omega}{2} - \frac{\omega^2}{2} + u_3\gamma + \sqrt{\Delta} \right). \quad (57)$$

When

$$\gamma \leq \frac{2\delta(\omega^2 + \omega)}{16u_1u_2 + 4u_3\delta + 3\delta^2}, \quad (58)$$

it can be verified that

$$\Delta \leq \left( 1 - \frac{\gamma\delta}{2} - \left( 1 - \frac{\omega}{2} - \frac{\omega^2}{2} + u_3\gamma \right) \right)^2, \quad (59)$$

and then,

$$\begin{aligned} \rho(U(\gamma)) &\leq \frac{1}{2} \left( \left( 1 - \gamma\delta + \left( 1 - \frac{\omega}{2} - \frac{\omega^2}{2} + u_3\gamma \right) \right) + \left( 1 - \frac{\gamma\delta}{2} - \left( 1 - \frac{\omega}{2} - \frac{\omega^2}{2} + u_3\gamma \right) \right) \right) \\ &= 1 - \frac{3}{4}\gamma\delta. \end{aligned} \quad (60)$$

We take

$$\begin{aligned} \gamma = \gamma(\omega) &:= \frac{3\delta}{4} \frac{2\delta(\omega^2 + \omega)}{16u_1u_2 + 4u_3\delta + 3\delta^2} \\ &= \frac{3\delta^3\omega^2(\omega + 1)}{48(\delta^2 + 18\delta\beta^2 + 36\beta^2)\beta^2(\omega + 2)(1 - \omega) + 4\delta^2(\beta^2 + \beta)(\omega + 2)(1 - \omega)\omega + 6\delta^3\omega}, \end{aligned} \quad (61)$$

which satisfies (58) since  $\frac{3\delta}{4} \leq 1$ . Notice that  $\gamma(\omega)$  increases monotonically with  $\omega$ , and  $\gamma(0) = 0, \gamma(1) = 1$ . Thus,  $\gamma(\omega) \in (0, 1]$  for  $\omega \in (0, 1]$ , which meets the algorithm design requirement. Then, the lemma is proved.  $\square$

**Lemma 4.** Let  $\{e_t\}_{t \geq 1}$  denotes a sequence of real values satisfying  $e_1 = 0$  and

$$e_{t+1} \leq (1 - p)e_t + q\eta_t^2, \quad (62)$$

for parameters  $p \in (0, 1), q > 0$ , and the stepsize sequence  $\{\eta_t\}_{t \geq 1}$  satisfying either of the following conditions

(i)  $\eta_t = \frac{b}{\sqrt{t+c}}$  for constants  $c \geq \frac{2}{p}, b \geq 0$ ,

(ii)  $\eta_t = \frac{b}{t+c}$  for constants  $c \geq \frac{4}{p}, b \geq 0$ .

Then for any  $t \geq 1$ ,

$$e_t \leq \frac{2q}{p}\eta_t^2. \quad (63)$$

*Proof.* We proceed the proof by induction. For  $t = 1$ , the statement holds since  $e_1 = 0$ . Suppose that the statement holds for  $t$ . Then for  $t + 1$ ,

$$e_{t+1} \leq (1 - p)e_t + q\eta_t^2 \leq (1 - p)\frac{2q}{p}\eta_t^2 + q\eta_t^2. \quad (64)$$

It remains to prove

$$(1 - p)\frac{2q}{p}\eta_t^2 + q\eta_t^2 \leq \frac{2q}{p}\eta_{t+1}^2. \quad \left( \iff 1 - \frac{p}{2} \leq \frac{\eta_{t+1}^2}{\eta_t^2} \right) \quad (65)$$

As for the condition (i),

$$\frac{\eta_{t+1}^2}{\eta_t^2} = \frac{t+c}{t+c+1} = 1 - \frac{1}{t+c+1} > 1 - \frac{p}{2}, \quad \forall t \geq 1. \quad (66)$$

As for the condition (ii),

$$\frac{\eta_{t+1}^2}{\eta_t^2} = \left( \frac{t+c}{t+c+1} \right)^2 > 1 - \frac{2}{t+c+1} > 1 - \frac{p}{2}, \quad \forall t \geq 1. \quad (67)$$

Thus, the conclusion follows.  $\square$

### Proof of Theorem 1

By Lemma 3 and Lemma 4, we have

$$e_t \leq \frac{48}{\gamma\delta} \left(1 + \frac{1}{\gamma\delta} + \frac{1}{\omega}\right) NG^2\eta_t^2. \quad (68)$$

According to the Jensen's Inequality,

$$\begin{aligned} \mathbb{E}_Q \|X^t - \bar{X}^t\| &\stackrel{(21)}{\leq} \sqrt{\mathbb{E}_Q \|X^t - \bar{X}^t\|^2} \leq \sqrt{e_t} \leq \sqrt{\frac{48}{\gamma\delta} \left(1 + \frac{1}{\gamma\delta} + \frac{1}{\omega}\right) NG^2\eta_t^2} \\ &\leq 4\sqrt{3} \left(1 + \frac{1}{\gamma\delta} + \frac{1}{\omega}\right) \sqrt{NG}\eta_t. \end{aligned} \quad (69)$$

Similarly to the procedure of (44), we estimate

$$\begin{aligned} \|\bar{X}^t - \tilde{X}^{t+1}\|^2 &= \|X^t - \gamma\mathbf{L}\hat{X}^{t+1} - \eta_t\nabla F^t(X^t) - \bar{X}^t\|^2 \\ &= \|(I - \gamma\mathbf{L})(X^t - \bar{X}^t) - \gamma\mathbf{L}(\hat{X}^{t+1} - X^t) - \eta_t\nabla F^t(X^t)\|^2 \\ &\stackrel{(17)}{\leq} \left(1 + \frac{\gamma\delta}{2}\right) \|(I - \gamma\mathbf{L})(X^t - \bar{X}^t)\|^2 \\ &\quad + \left(1 + \frac{2}{\gamma\delta}\right) \left( (1+2) \|\gamma\mathbf{L}(\hat{X}^{t+1} - X^t)\|^2 + \left(1 + \frac{1}{2}\right) \|\eta_t\nabla F^t(X^t)\|^2 \right). \end{aligned} \quad (70)$$

Together with the estimate of  $\mathbb{E}_Q \|R^{t+1}\|^2$  and the choice of  $\gamma$  in (5), we have

$$\begin{aligned} &\mathbb{E}_Q \left( \|\bar{X}^t - \tilde{X}^{t+1}\|^2 + 3\|R^{t+1}\|^2 \right) \\ &\leq \left(1 + \frac{\gamma\delta}{2}\right) (1 - \gamma\delta)^2 \mathbb{E}_Q \|X^t - \bar{X}^t\|^2 + 3 \left(1 + \frac{2}{\gamma\delta}\right) (1 - \omega)\beta^2\gamma^2 \|X^t - \hat{X}^t\|^2 \\ &\quad + \frac{3}{2} \left(1 + \frac{2}{\gamma\delta}\right) NG^2\eta_t^2 + 3 \left(2(1 - \omega)\beta^2\gamma^2 \|X^t - \hat{X}^t\|^2 + 2NG^2\eta_t^2\right) \\ &\leq (1 - \gamma\delta) \mathbb{E}_Q \|X^t - \bar{X}^t\|^2 + 9 \left(1 + \frac{2}{\delta}\right) (1 - \omega)\beta^2\gamma \|X^t - \hat{X}^t\|^2 + \left(\frac{15}{2} + \frac{3}{\gamma\delta}\right) NG^2\eta_t^2 \\ &= [1 \quad 0] U(\gamma) \begin{bmatrix} \mathbb{E}_Q \|X^t - \bar{X}^t\| \\ \mathbb{E}_Q \|X^t - \hat{X}^t\| \end{bmatrix} + \left(\frac{15}{2} + \frac{3}{\gamma\delta}\right) NG^2\eta_t^2 \\ &\leq \rho(U(\gamma))e_t + \left(\frac{15}{2} + \frac{3}{\gamma\delta}\right) NG^2\eta_t^2 \\ &\stackrel{(68)}{\leq} \left(1 - \frac{3}{4}\gamma\delta\right) \frac{48}{\gamma\delta} \left(1 + \frac{1}{\gamma\delta} + \frac{1}{\omega}\right) NG^2\eta_t^2 + \left(\frac{15}{2} + \frac{3}{\gamma\delta}\right) NG^2\eta_t^2 \\ &= \left( \left(\frac{48}{\gamma\delta} - 36\right) \left(1 + \frac{1}{\gamma\delta} + \frac{1}{\omega}\right) + \frac{15}{2} + \frac{3}{\gamma\delta} \right) NG^2\eta_t^2, \end{aligned} \quad (71)$$

where  $U(\gamma)$  is defined in Lemma 3.

For the strongly convex case (ii), we substitute (69) and (71) into (30), and derive

$$\begin{aligned} \mathbb{E}_Q R(j, T) &\leq \mu c D^2 + NG^2 \sum_{t=1}^T \eta_t + (2\sqrt{N} + N)G \sum_{t=1}^T 4\sqrt{3} \left(1 + \frac{1}{\gamma\delta} + \frac{1}{\omega}\right) \sqrt{NG}\eta_t \\ &\quad + \sum_{t=1}^T \frac{1}{2\eta_t} \left( \left(\frac{48}{\gamma\delta} - 36\right) \left(1 + \frac{1}{\gamma\delta} + \frac{1}{\omega}\right) + \frac{15}{2} + \frac{3}{\gamma\delta} \right) NG^2\eta_t^2 \\ &\leq \mu c D^2 + 4\sqrt{3} \left( \sqrt{N} + \frac{2\sqrt{3}}{\gamma\delta} + 1 \right) \left(1 + \frac{1}{\gamma\delta} + \frac{1}{\omega}\right) NG^2 \sum_{t=1}^T \eta_t, \end{aligned} \quad (72)$$



where the last inequality holds since  $(4\sqrt{3} + \frac{3}{2} - 18) / \gamma\delta < 0$  and  $1 + (4\sqrt{3} - 18)(1 + \frac{1}{\omega}) + \frac{15}{4} < 0$  for  $\omega \in (0, 1]$ . Consider the gradient stepsize  $\eta_t = \frac{1}{\mu(t+c)}$  for  $c \geq \frac{16}{3\gamma\delta} > 1$ , and then,

$$\sum_{t=1}^T \eta_t = \sum_{t=1}^T \frac{1}{\mu(t+c)} \leq \frac{1}{\mu} \int_0^T \frac{1}{s+c} ds = \frac{1}{\mu} \ln(s+c)|_0^T \leq \frac{1}{\mu} \ln(T+c). \quad (73)$$

Combining (72) with (73), we obtain (7).

For the convex case (i), the gradient stepsize  $\eta_t = \frac{D}{G\sqrt{t+c}}$ , and then,

$$\sum_{t=1}^T \eta_t = \sum_{t=1}^T \frac{D}{G\sqrt{t+c}} \leq \frac{D}{G} \int_0^T \frac{1}{\sqrt{s+c}} ds = \frac{D}{G} 2\sqrt{s+c}|_0^T \leq \frac{2D}{G} \sqrt{T+c}. \quad (74)$$

By substituting (69), (71), and (74) into (29), we derive

$$\begin{aligned} \mathbb{E}_Q R(j, T) &\leq \frac{ND^2}{2\eta_T} + 4\sqrt{3} \left( \sqrt{N} + \frac{2\sqrt{3}}{\gamma\delta} + 1 \right) \left( 1 + \frac{1}{\gamma\delta} + \frac{1}{\omega} \right) NG^2 \sum_{t=1}^T \eta_t \\ &\leq \frac{ND^2}{2} \frac{G\sqrt{T+c}}{D} + 4\sqrt{3} \left( \sqrt{N} + \frac{2\sqrt{3}}{\gamma\delta} + 1 \right) \left( 1 + \frac{1}{\gamma\delta} + \frac{1}{\omega} \right) NG^2 \frac{2D}{G} \sqrt{T+c}. \end{aligned}$$

Then the theorem is proved.  $\square$

### C Proofs of Section 3

Algorithm 2 actually performs the gradient descent scheme on the function  $\hat{f}_i^t(x) = \mathbb{E}_{u \in \mathcal{B}} [f_i^t(x + \epsilon u)]$  restricted to the convex set  $(1 - \zeta)\mathcal{K}$ . By Assumptions 6 and 7, as well as the construction of  $g_i^t$ ,

$$\begin{aligned} \|\nabla \hat{f}_i^t(x)\| &= \|\mathbb{E} [g_i^t]\| \leq \mathbb{E} [\|g_i^t\|] \leq \mathbb{E} \left[ \frac{d}{\epsilon} \|f_i^t\| \|u_i^t\| \right] \leq \frac{dB}{\epsilon} := G, \quad \forall i \in \mathcal{V}, t = 1, \dots, T, \\ \|x - y\| &\leq 2R := D, \quad \forall x, y \in (1 - \zeta)\mathcal{K}. \end{aligned}$$

The remaining gaps include 1) the difference between the case of the loss function  $f_i^t$  and that of  $\hat{f}_i^t$ ; 2) the difference between the case of the feasible set  $(1 - \zeta)\mathcal{K}$  and that of  $\mathcal{K}$ . As for 1), by Assumption 7, we have

$$\|\hat{f}_i^t(x) - f_i^t(x)\| = \|\mathbb{E}_u [f_i^t(x + \epsilon u)] - f_i^t(x)\| \leq \mathbb{E}_u \|f_i^t(x + \epsilon u) - f_i^t(x)\| \leq l\epsilon,$$

and thus,

$$\hat{f}_i^t(x) - l\epsilon \leq f_i^t(x) \leq \hat{f}_i^t(x) + l\epsilon. \quad (75)$$

As for 2), we have the following lemma from [4].

**Lemma 5.** *The optimum in  $(1 - \zeta)\mathcal{K}$  is near the optimum in  $\mathcal{K}$ .*

$$\min_{x \in (1-\zeta)\mathcal{K}} \sum_{t=1}^T \sum_{i=1}^N f_i^t(x) \leq 2\zeta BNT + \min_{x \in \mathcal{K}} \sum_{t=1}^T \sum_{i=1}^N f_i^t(x). \quad (76)$$

By Lemma 5, we can obtain the regret bounds in the one-point bandit setting upon the obtained results in the full information setting.

$$\begin{aligned} \mathbb{E} [R(j, T)] &= \mathbb{E} \sum_{t=1}^T \sum_{i=1}^N f_i^t(x_j^t) - \min_{x \in \mathcal{K}} \sum_{t=1}^T \sum_{i=1}^N f_i^t(x) \\ &\stackrel{(76)}{\leq} \mathbb{E} \sum_{t=1}^T \sum_{i=1}^N f_i^t(x_j^t) - \min_{x \in (1-\zeta)\mathcal{K}} \sum_{t=1}^T \sum_{i=1}^N f_i^t(x) + 2\zeta BNT \\ &\stackrel{(75)}{\leq} \mathbb{E} \sum_{t=1}^T \sum_{i=1}^N \left( \hat{f}_i^t(x_j^t) + l\epsilon \right) - \min_{x \in (1-\zeta)\mathcal{K}} \sum_{t=1}^T \sum_{i=1}^N \left( \hat{f}_i^t(x_j^t) - l\epsilon \right) + 2\zeta BNT \\ &= \mathbb{E} \sum_{t=1}^T \sum_{i=1}^N \hat{f}_i^t(x_j^t) - \min_{x \in (1-\zeta)\mathcal{K}} \sum_{t=1}^T \sum_{i=1}^N \hat{f}_i^t(x_j^t) + 2l\epsilon NT + 2\zeta BNT. \quad (77) \end{aligned}$$

## Proof of Theorem 2

(i) (Convex case) From Theorem 1 part (i), we have

$$\mathbb{E} \sum_{t=1}^T \sum_{i=1}^N \hat{f}_i^t(x_j^t) - \min_{x \in (1-\zeta)\mathcal{K}} \sum_{t=1}^T \sum_{i=1}^N \hat{f}_i^t(x) \leq \left(\frac{1}{2} + 2H\right) N \frac{dB}{\epsilon} 2R\sqrt{T+c}, \quad (78)$$

where  $H$  is defined in (8). Then by (77) with  $\zeta = \frac{\epsilon}{r}$ ,

$$\mathbb{E} [\mathbb{R}(j, T)] \leq (1 + 4H) N \frac{dBR}{\epsilon} \sqrt{T+c} + 2l\epsilon NT + 2\frac{\epsilon}{r} BNT. \quad (79)$$

We choose  $\epsilon = \left(\frac{(1+4H)dBR}{2(l+\frac{B}{r})}\right)^{\frac{1}{2}} \frac{(T+c)^{\frac{1}{4}}}{T^{\frac{1}{2}}}$  to minimize the right hand of the above inequality and then obtain the conclusion.

(ii) (Strongly convex case) From Theorem 1 part (ii), we have

$$\mathbb{E} \sum_{t=1}^T \sum_{i=1}^N \hat{f}_i^t(x_j^t) - \min_{x \in (1-\zeta)\mathcal{K}} \sum_{t=1}^T \sum_{i=1}^N \hat{f}_i^t(x) \leq 4\mu cR^2 + H \frac{Nd^2B^2}{\mu\epsilon^2} \ln(T+c), \quad (80)$$

where  $H$  is defined in (8). Then by (77) with  $\zeta = \frac{\epsilon}{r}$ ,

$$\mathbb{E} [\mathbb{R}(j, T)] \leq 4\mu cR^2 + H \frac{Nd^2B^2}{\mu\epsilon^2} \ln(T+c) + 2l\epsilon NT + 2\frac{\epsilon}{r} BNT. \quad (81)$$

We choose  $\epsilon = \left(\frac{Hd^2B^2 \ln(T+c)}{(l+\frac{B}{r})T}\right)^{\frac{1}{3}}$  to minimize the right hand of the above inequality and then obtain the conclusion.  $\square$

## D Proofs of Section 4

The proof in the two-point bandit case takes a similar procedure as that in the one-point case. By Assumptions 6 and 7, as well as the construction of  $g_i^t$ ,

$$\begin{aligned} \left\| \nabla \hat{f}_i^t(x) \right\| &= \left\| \mathbb{E} [g_i^t] \right\| \leq \mathbb{E} [\|g_i^t\|] \leq \mathbb{E} \left[ \frac{d}{2\epsilon} \|f_i^t(x_i^t + \epsilon u_i^t) - f_i^t(x_i^t - \epsilon u_i^t)\| \|u_i^t\| \right] \\ &\leq \frac{d}{2\epsilon} l 2\epsilon \|u_i^t\|^2 = dl := G, \quad \forall i \in \mathcal{V}, t = 1, \dots, T, \\ \|x - y\| &\leq 2R := D, \quad \forall x, y \in (1-\zeta)\mathcal{K}. \end{aligned}$$

Similar to the Lemma 2 in [5], we have

**Lemma 6.** For any point  $x \in \mathcal{K}$ ,

$$\begin{aligned} \sum_{t=1}^T \sum_{i=1}^N \frac{f_i^t(y_{i,1}^t) + f_i^t(y_{i,2}^t)}{2} - \sum_{t=1}^T \sum_{i=1}^N f_i^t(x) \\ \leq \sum_{t=1}^T \sum_{i=1}^N \hat{f}_i^t(x_j^t) - \sum_{t=1}^T \sum_{i=1}^N \hat{f}_i^t((1-\zeta)x) + 3NTG\epsilon + NTGD\zeta. \end{aligned} \quad (82)$$

By Lemma 6, for  $x^* = \arg \min_{x \in \mathcal{K}} \sum_{t=1}^T \sum_{i=1}^N f_i^t(x)$ ,

$$\begin{aligned} \mathbb{E} [\mathbb{R}_2(j, T)] &= \mathbb{E} \sum_{t=1}^T \sum_{i=1}^N \frac{f_i^t(y_{i,1}^t) + f_i^t(y_{i,2}^t)}{2} - \sum_{t=1}^T \sum_{i=1}^N f_i^t(x^*) \\ &\leq \mathbb{E} \sum_{t=1}^T \sum_{i=1}^N \hat{f}_i^t(x_j^t) - \sum_{t=1}^T \sum_{i=1}^N \hat{f}_i^t((1-\zeta)x^*) + 3NTG\epsilon + NTGD\zeta \\ &\leq \mathbb{E} \sum_{t=1}^T \sum_{i=1}^N \hat{f}_i^t(x_j^t) - \min_{x \in (1-\zeta)\mathcal{K}} \sum_{t=1}^T \sum_{i=1}^N \hat{f}_i^t(x) + 3NTd\ell\epsilon + 2NTdlR\zeta \end{aligned} \quad (83)$$

### Proof of Theorem 3

(i) (Convex case) From Theorem 1 part (i), we have

$$\mathbb{E} \sum_{t=1}^T \sum_{i=1}^N \hat{f}_i^t(x_j^t) - \min_{x \in (1-\zeta)\mathcal{K}} \sum_{t=1}^T \sum_{i=1}^N \hat{f}_i^t(x) \leq \left(\frac{1}{2} + 2H\right) Ndl2R\sqrt{T+c}, \quad (84)$$

where  $H$  is defined in (8). Then by (83) with  $\zeta = \frac{\epsilon}{r}$ ,

$$\mathbb{E} [R_2(j, T)] \leq (1 + 4H) NdlR\sqrt{T+c} + \left(3 + \frac{2R}{r}\right) NdlT\epsilon. \quad (85)$$

We choose  $\epsilon = \frac{1}{\sqrt{T}}$  and then obtain the conclusion.

(ii) (Strongly convex case) From Theorem 1 part (ii), we have

$$\mathbb{E} \sum_{t=1}^T \sum_{i=1}^N \hat{f}_i^t(x_j^t) - \min_{x \in (1-\zeta)\mathcal{K}} \sum_{t=1}^T \sum_{i=1}^N \hat{f}_i^t(x) \leq 4\mu cR^2 + H \frac{Nd^2l^2}{\mu} \ln(T+c), \quad (86)$$

where  $H$  is defined in (8). Then by (83) with  $\zeta = \frac{\epsilon}{r}$ ,

$$\mathbb{E} [R_2(j, T)] \leq 4\mu cR^2 + H \frac{Nd^2l^2}{\mu} \ln(T+c) + \left(3 + \frac{2R}{r}\right) NdlT\epsilon \quad (87)$$

We choose  $\epsilon = \frac{\ln(T)}{T}$  and then obtain the conclusion.  $\square$

## E Parameters selection details

The theoretical value of the consensus stepsize  $\gamma$  depends on the compression ratio  $\omega$  and the graph parameters  $\delta, \beta$ , which is pretty conservative. We tune  $\gamma$  for each experiment. The gradient descent step-sizes of DC-DOGD, DC-DOBD and DC-DO2BD for convex losses can be written in a unified form as  $\eta_t = \frac{b}{\sqrt{t+c}}$ , where  $c = \frac{8}{3\gamma\delta}$  as in theorems and  $b$  is tuned from  $\{0.001, 0.005, 0.01, 0.05, 0.1, 0.5, 1\}$ . Also, for strongly convex losses, the gradient descent stepsize can be written as  $\eta_t = \frac{b}{t+c}$ , where  $c = \frac{16}{3\gamma\delta}$  as in theorems and  $b$  is tuned. In DC-DOBD and DC-DO2BD, the shrinkage parameter  $\zeta = \frac{\epsilon}{r}$  as in theorems and the exploration parameter  $\epsilon$  is tuned from  $\{0.001, 0.005, 0.01, 0.05, 0.1, 0.5, 1\}$ . For each experiment,  $b$  and  $\epsilon$  are tuned by grid search.

**Parameters in Fig. 1** In this experiment, we set  $\gamma = 0.26$  for QSGD<sub>2</sub> with  $\omega = 0.3$  over  $\mathcal{G}(9, 18)$ . The parameters  $b$  and  $\epsilon$  for the proposed algorithms are given in Table 2. The parameters for ECD-AMDGrad are chosen as suggested in [6].

Table 2: Parameters  $b$  and  $\epsilon$  for the proposed algorithms

| Parameters | Convex losses |            | Strongly convex |            |
|------------|---------------|------------|-----------------|------------|
|            | $b$           | $\epsilon$ | $b$             | $\epsilon$ |
| DC-DOGD    | 0.1           | \          | 1               | \          |
| DC-DOBD    | 0.01          | 0.5        | 0.05            | 0.5        |
| DC-DO2BD   | 0.1           | 0.05       | 0.5             | 0.01       |

**Parameters in Fig. 2** When studying the impacts of compression ratio and compressor type, we take DC-DOGD with strongly convex losses over the graph  $\mathcal{G}(N, 2N)$  as an example, and set  $b = 1$ . The corresponding  $\gamma$  for different compression ratios  $\omega$  (with the same compressor type  $\text{Top}_k$ ) are given in Table 3, and the corresponding  $\gamma$  for different compressor types (with the same compression ratio  $\omega = 0.3$ ) are given in Table 4. DAOL takes the same gradient descent stepsizes as DC-DOGD.

**Parameters in Fig. 3** When studying the impact of network topology, we take DC-DOGD with strongly convex losses as an example, and set  $b = 1$ . For the compressor  $\text{Top}_1$  with  $\omega = 0.05$ , we set  $\gamma = 0.09$ . When studying the impact of node number, we take the compressor  $\text{Top}_2$  with  $\omega = 0.1$  and set  $\gamma = 0.1$ . The parameters  $b$  and  $\epsilon$  are chosen the same as Table 2.

Table 3: Corresponding  $\gamma$  for different  $\omega$ 

| $\omega$ | 0.05 | 0.1 | 0.5  |
|----------|------|-----|------|
| $\gamma$ | 0.09 | 0.1 | 0.32 |

Table 4: Corresponding  $\gamma$  for different compressors

| Compressor | RGossip <sub>p</sub> | Rand <sub>k</sub> | Top <sub>k</sub> | GSGD <sub>s</sub> |
|------------|----------------------|-------------------|------------------|-------------------|
| $\gamma$   | 0.09                 | 0.09              | 0.28             | 0.26              |

## F Additional experiments

We give some additional experiments in the convex cases here. Still, we use the dataset *diabetes-binary-BRFSS2015*<sup>5</sup>. The communication graph is generated by the tool *NetworkX*<sup>6</sup> and the best solution is obtained by the tool *Logistic Regression*<sup>7</sup>. Our code is available at <https://github.com/happy-math/CC-DOCO>.

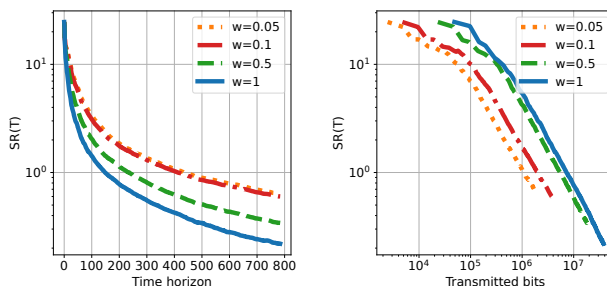

Figure 4: The impact of compression ratio  $\omega$ . Setting: DC-DOGD with the compressor Top<sub>k</sub> over  $\mathcal{G}(9, 18)$  in the convex case.  $b = 1$ . The corresponding  $\gamma$  for different  $w$  are chosen as in Table 3.

## References

- [1] Anastasia Koloskova, Sebastian Stich, and Martin Jaggi. Decentralized stochastic optimization and gossip algorithms with compressed communication. In *International Conference on Machine Learning*, pages 3478–3487. PMLR, 2019.
- [2] Jinlong Lei, Peng Yi, Yiguang Hong, Jie Chen, and Guodong Shi. Online convex optimization over Erdős-Rényi random networks. *Advances in Neural Information Processing Systems*, 33:15591–15601, 2020.
- [3] Feng Yan, Shreyas Sundaram, SVN Vishwanathan, and Yuan Qi. Distributed autonomous online learning: Regrets and intrinsic privacy-preserving properties. *IEEE Transactions on Knowledge and Data Engineering*, 25(11):2483–2493, 2012.
- [4] Abraham D Flaxman, Adam Tauman Kalai, and H Brendan McMahan. Online convex optimization in the bandit setting: gradient descent without a gradient. In *Proceedings of the 16th Annual ACM-SIAM Symposium on Discrete Algorithms*, pages 385–394, 2005.
- [5] Alekh Agarwal, Ofer Dekel, and Lin Xiao. Optimal algorithms for online convex optimization with multi-point bandit feedback. In *Proceedings of the 23rd Annual Conference on Learning Theory*, 28–40. Citeseer, 2010.
- [6] Guangxia Li, Jia Liu, Xiao Lu, Peilin Zhao, Yulong Shen, and Dusit Niyato. Decentralized online learning with compressed communication for near-sensor data analytics. *IEEE Communications Letters*, 25(9):2958–2962, 2021.

<sup>5</sup>Apache 2.0 open source license

<sup>6</sup>Open source 3-clause BSD license

<sup>7</sup>Open source, commercially usable - BSD license

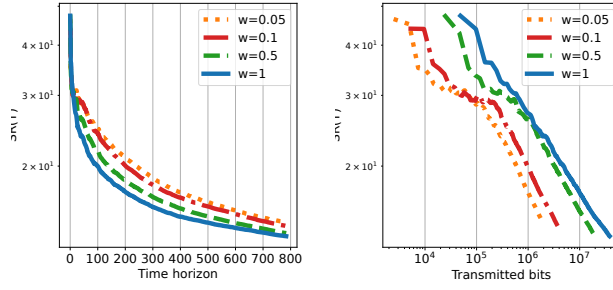

Figure 5: The impact of compression ratio  $\omega$ . Setting: DC-DOBD with the compressor  $\text{Top}_k$  over  $\mathcal{G}(9, 18)$  in the convex case.  $b = 0.01, \epsilon = 1$ . The corresponding  $\gamma$  for different  $w$  are chosen as in Table 3.

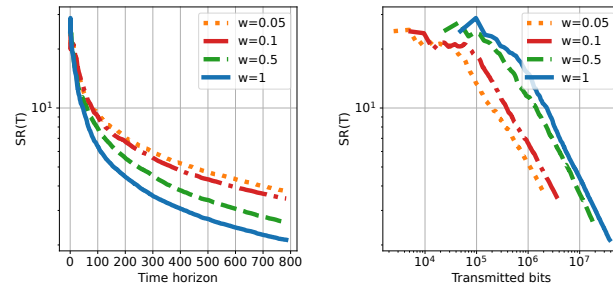

Figure 6: The impact of compression ratio  $\omega$ . Setting: DC-DO2BD with the compressor  $\text{Top}_k$  over  $\mathcal{G}(9, 18)$  in the convex case.  $b = 0.1, \epsilon = 0.05$ . The corresponding  $\gamma$  for different  $w$  are chosen as in Table 3.

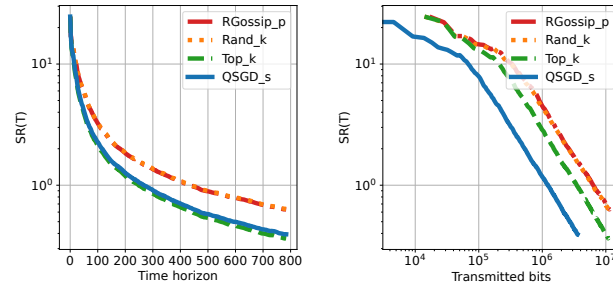

Figure 7: The impact of compressor type. Setting: DC-DOGD with the compression ratio  $\omega = 0.3$  over  $\mathcal{G}(9, 18)$  in the convex case.  $b = 0.1$ . The corresponding  $\gamma$  for different compressor types are chosen as in Table 4.

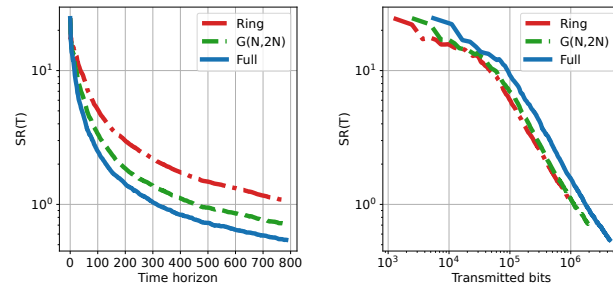

Figure 8: The impact of topology. Setting: DC-DOGD with  $\text{Top}_1, \omega = 0.05$  in the convex case.  $b = 0.1, \gamma = 0.09$ .
